# Supplementary material for: A novel ordered SiOxCy film anode fabricated via electrodeposition in air for Li-ion batteries
Source: Royal Society of Chemistry journal article supplement (doi:10.1039/c3ta14719c), 2013-12-13
Supplement: c3ta14719c.pdf [file c3ta14719c.pdf]

## *Supporting Information*

### **A novel ordered SiO<sub>x</sub>C<sub>y</sub> film anode fabricated via electrodeposition in air for Li-ion batteries†**

*Jiguo Tu, Wei Wang, Liwen Hu, Hongmin Zhu, Shuqiang Jiao\**

*State Key Laboratory of Advanced Metallurgy, University of Science and Technology  
Beijing, Beijing 100083, P.R. China*

*\*Corresponding Author: E-mail: sjiao@ustb.edu.cn*

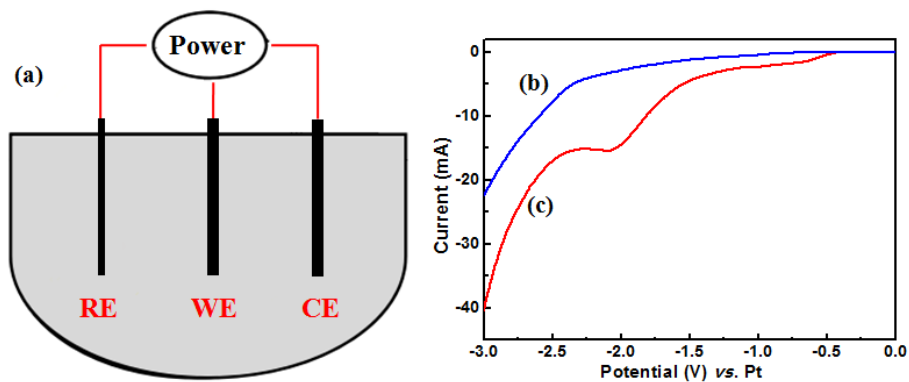

**Fig. S1** The schematic diagram of the three-electrode cell for electrodeposition (a), linear sweep voltammograms of carbon paper electrode in  $\text{CH}_3\text{CN}$  containing 0.1 M TBACl without VTC (b) and with 0.3 M VTC (c) with a scan rate of  $10 \text{ mV s}^{-1}$ .

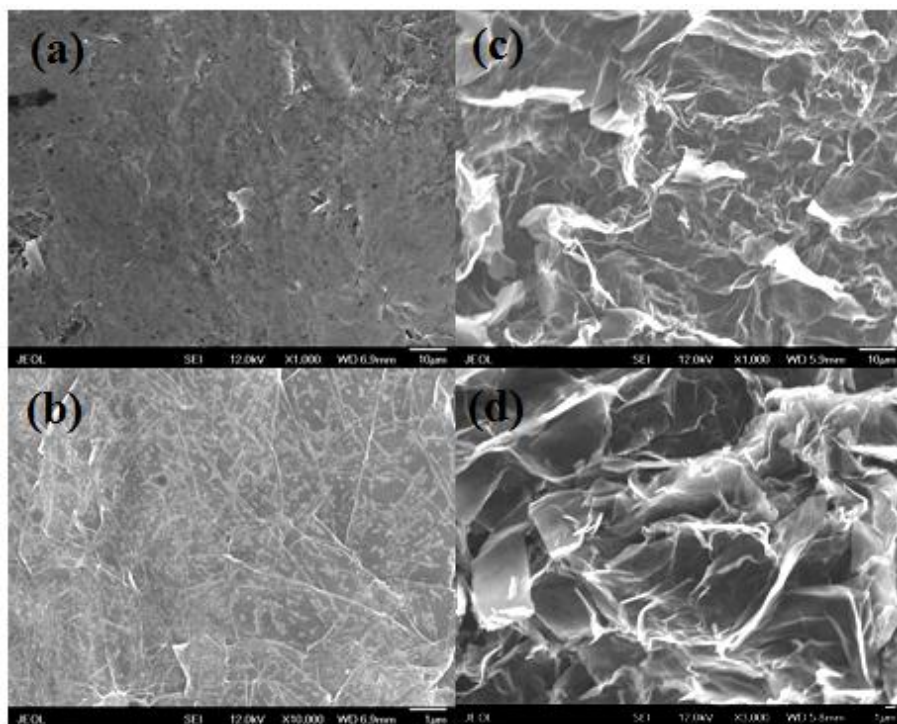

**Fig. S2** The FESEM images of carbon paper (a, b) and the deposit on the carbon paper before adding VTC precursor (c, d).

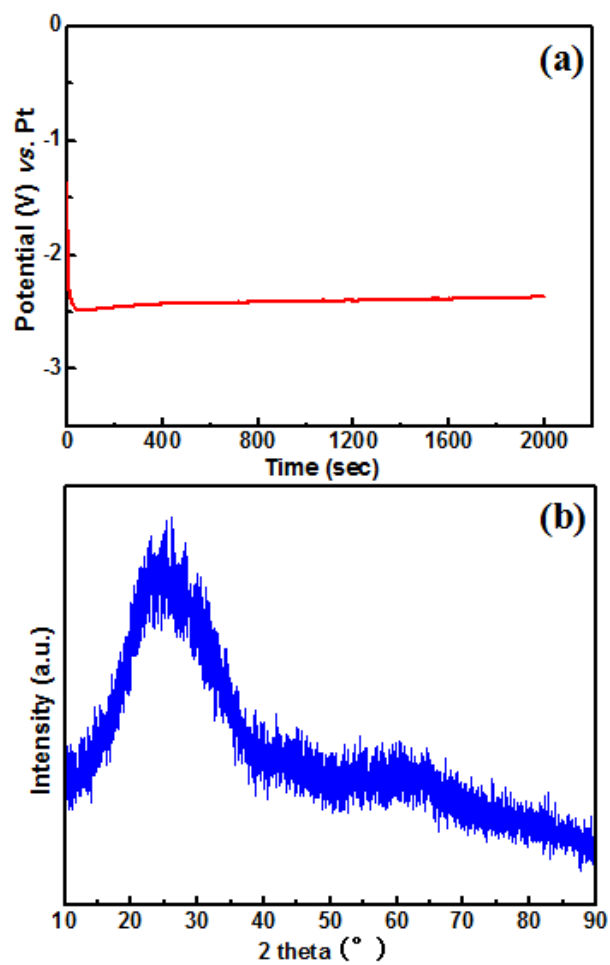

**Fig. S3** Chronopotentiogram at a constant current of -20 mA of the film fabricated by electrodeposition on a carbon paper in VTC-TBACl-CH<sub>3</sub>CN electrolyte (a) and XRD pattern of the obtained deposit (b).

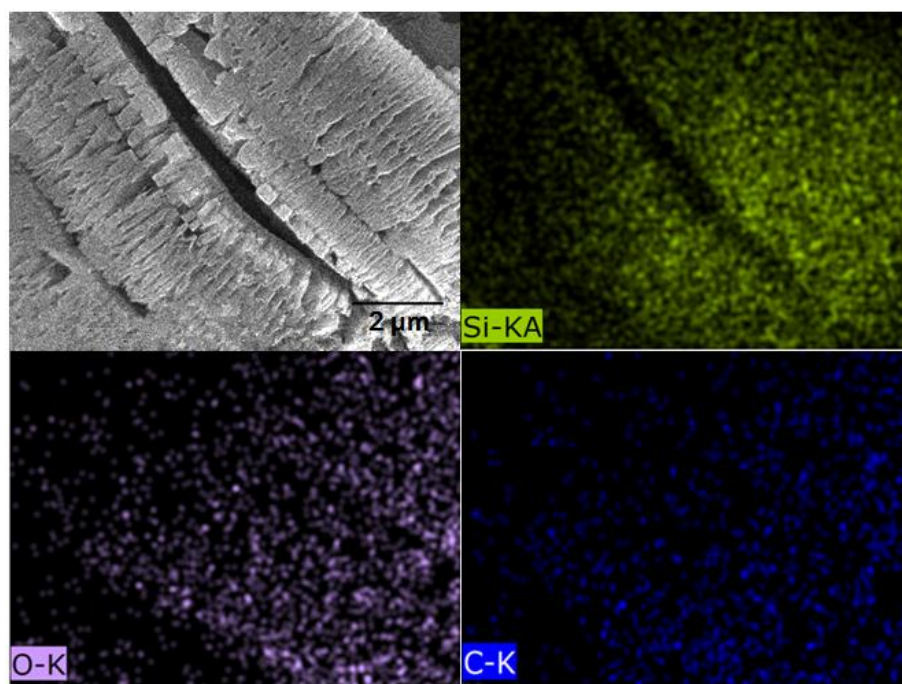

**Fig. S4** The element mapping images of the deposit on the carbon paper after adding VTC precursor.

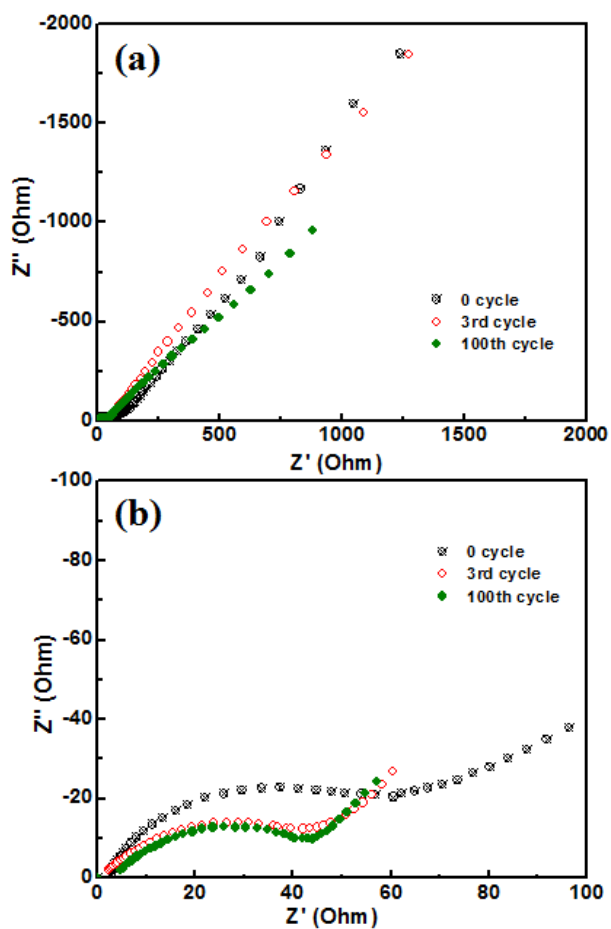

**Fig. S5** The Nyquist plots of the SiO<sub>x</sub>Cy film anode in an open-circuit potential with a frequency range from 100 kHz to 10 mHz after different cycles (a, b).
